# Supplementary material for: Megabase-scale deletion using CRISPR/Cas9 to generate a fully haploid human cell line
Source: HighWire-hosted journal article supplement (doi:10.1101/gr.177220.114), 2014-11-04
Supplement: Supplemental_Figure_Legends.docx [file Supplemental_Figure_Legends.docx]

**Supplementary Figure Legends**

**Supplementary Figure 1 Light-microscopic images of KBM-7 and HAP1 cells.**

**Supplementary Figure 2 Transfection efficiency in HAP1 cells.** HAP1 cells were transfected with a GFP expression plasmid using TurboFectin (OriGene) according to manufacturer’s instructions. Cells were analyzed by fluorescence microscopy 24h post transfection. Following that, cells were also analyzed by flow cytometry.

**Supplementary Figure 3 T7 Endonuclease assay from single transfectants.** To assess the efficiency of the four guide RNAs under controlled conditions, we transfected HAP1 cells with a Cas9 expression plasmid and every single guide RNA (as indicated). Pools of transfected cells were subjected to the T7 Endonuclease assay.

**Supplementary Figure 4 Deletion PCR from various clones.** To assess whether deletion of the chromosome 15 fragment had occurred in various clones, we isolated genomic DNA and subjected them to deletion PCR.

**Supplementary Figure 5** SNP genotyping analysis for HAP1 wt and four edited clones. Genomic DNA was isolated four clones (A8, A11, B11 and F6), as well as HAP1 wt cells. The indicated genomic loci, containing SNPs that were heterozygous in HAP1 cells, were amplified by PCR. PCR products were purified and sent for Sanger sequencing.

**Supplementary Figure 6** Clones A11 and E9 arose from different editing events. Deletion PCR products obtained from clones A11 and E9 (see Figure 3A) were sent for Sanger sequencing and aligned to the human genome.

**Supplementary Figure 7 Spectral karyotyping of clones A8, B11 and F6.** Clones A8, B11 and F6 were analyzed by spectral karyotyping to visual global genomic changes in these clones.

**Supplementary Figure 8 Karyotypic stability of clones A11 and E9.** Clones A11 and E9, as well as HAP1 wt cells, were passaged as indicated (for two passages or twenty passages). Following passaging, cells were stained by propidium iodide staining to assess the ploidy. A diploid control cell lines was included for reference.

**Supplementary Figure 9 Copy number analysis based on whole genome sequencing.** Whole genome sequencing was performed on two replicates of HAP1 cells and one replicate each of eHAP A11 and eHAP E9 clones. Each panel shows the coverage distribution in one sample across the chromosomes. White regions correspond to unassembled parts of the human genome. Dark bands near chromosome extremities are artifacts of the unassembled regions. Color scales indicate different sequencing depths. (A-B) Coverage from the two replicates of HAP1 cells show higher copy number of the fragment on chr15. (C-D) Coverage from the two clones suggests equal copy number across the entire genome.

**Supplementary Figure 10 Genetic differences in clone E9.** Whole genome sequencing data from two replicates of HAP1 and one replicate of E9 were compared pairwise for substitution and short insertion or deletion events. The table indicates the number of events gained and lost in each sample after variant calling and filtering. Red values indicate substitution events. Blue values indicate insertion and deletions. The two tables contain events across the whole genome and present outside of the edited region on chr15.

**Supplementary Figure 11 Localization of genetic differences in clone E9.** (A) Genetic variants lost in the E9 clone with respect to the parental HAP1 cells. Most of the events lie within the edited region and correspond to SNPs present on the lost chr15 fragment. (B) Genetic variants gained in E9 with respect to HAP1. The events are dispersed across the genome and thus correspond to genetic drift. The inset shows the detected substitutions are primarily of type CA (or GT). Red values indicate substitution events. Blue values indicate insertion and deletions.

**Supplementary Table 1 Putative off-target sites of guide RNAs 1 and 3.** Putative off-target sites for guide RNAs 1 (CCAAGGCAACGGGACTGTGC) and guide RNAs 3 (CAGCCACATCTACCGCCATG) were retrieved from <http://crispr.mit.edu/>
